# Supplementary material
Source: publisher figshare collection journal article supplement (https://gsapubs.figshare.com/ndownloader/files/22399254)
Supplement: Supplementary file 1 [file 22399254]

*Hornet Trench Photomosaic*

*South*

*North*

*Bench*

*Bench*

*Bench*

1m

1m

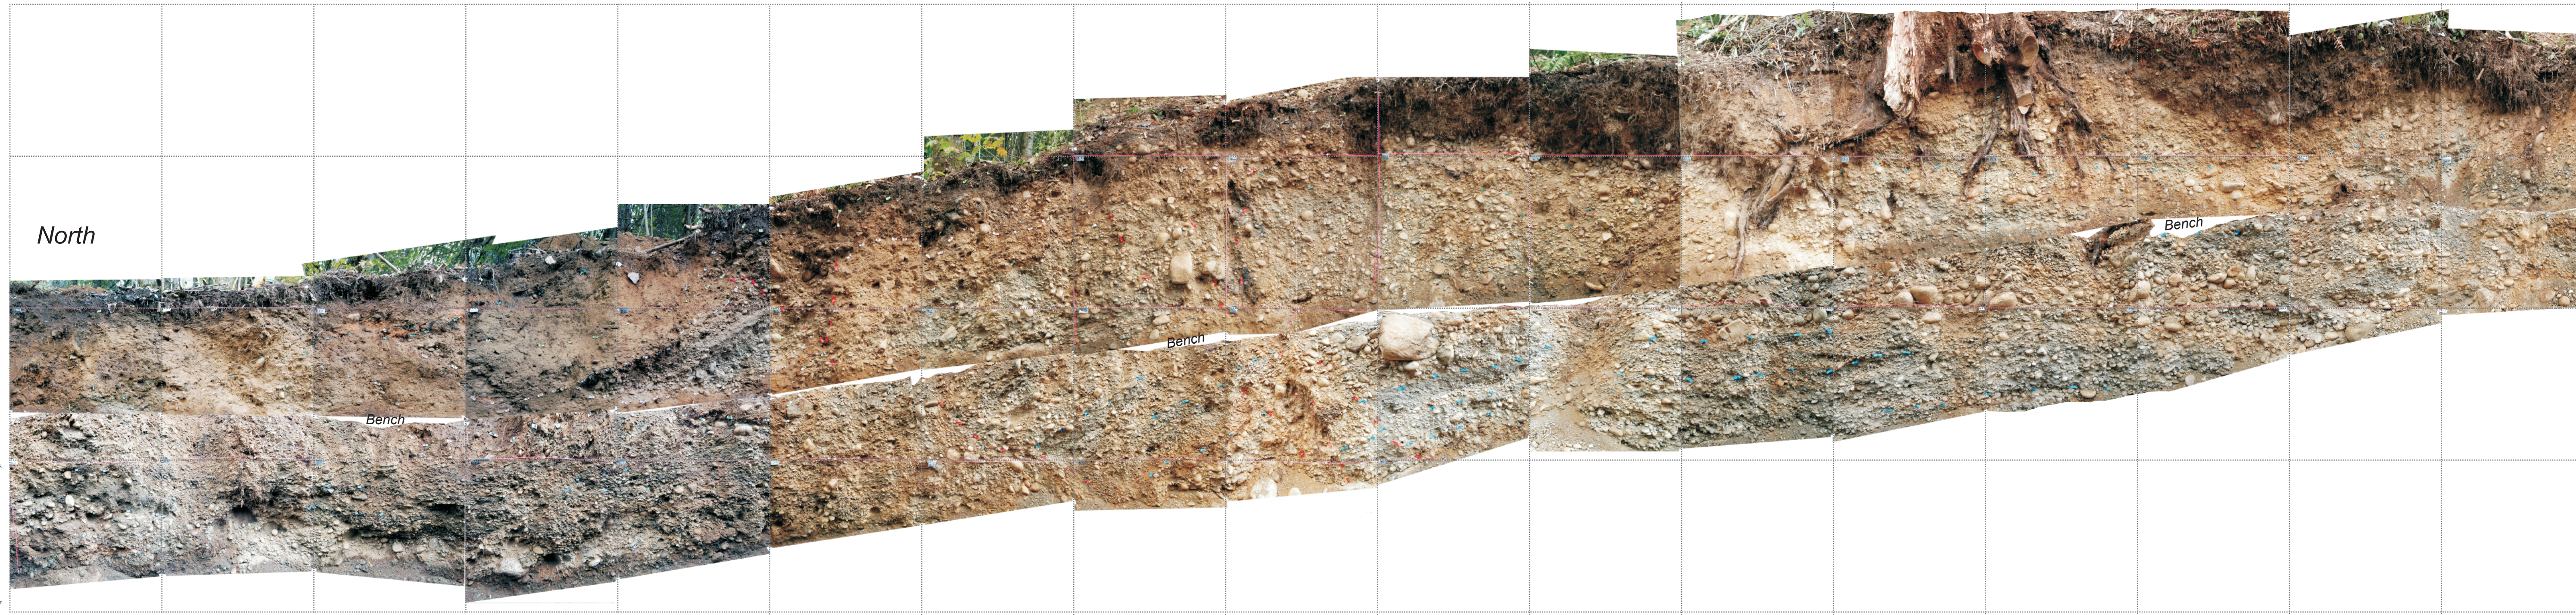



South

## Smuggler Trench Photomosaic

*North*

Bench

*Bench*

Bench



1m

$1m$
